# Supplementary material
Source: PubMed Central journal article supplement (PMC5819995)
Supplement: NIHMS922005-supplement.pdf [file NIHMS922005-supplement.pdf]

## **Supplemental Information**

### **GDC-0879, a BRAF<sup>V600E</sup> inhibitor, protects kidney podocytes from death**

**Jonas Sieber, Nicolas Wieder, Abbe Clark, Manuel Reitberger, Sofia Matan, Jeannine Schoenfelder, Jianming Zhang, Anna Mandinova, Joshua Adam Bittker, Juan Gutierrez, Ozan Aygun, Namrata Udeshi, Steven Carr, Peter Mundel, Andreas Werner Jehle, and Anna Greka**

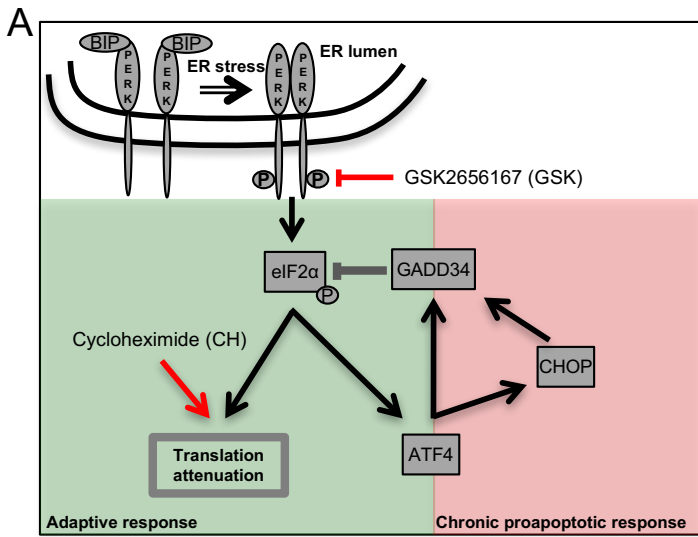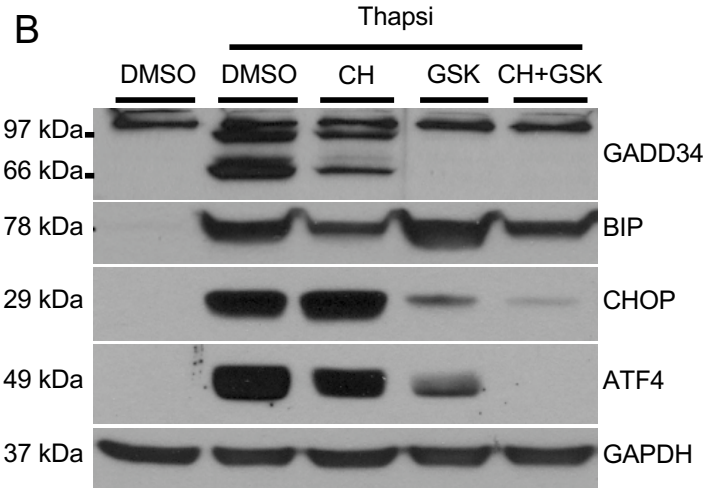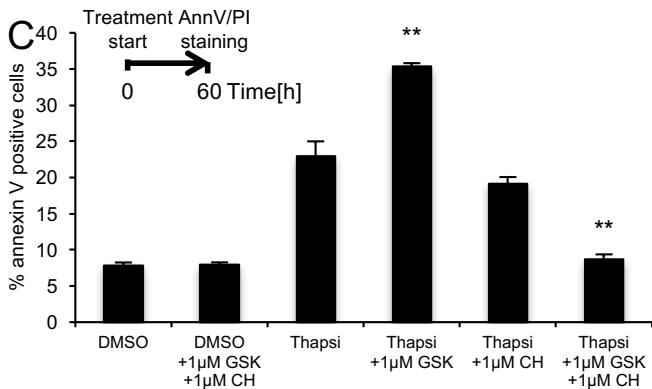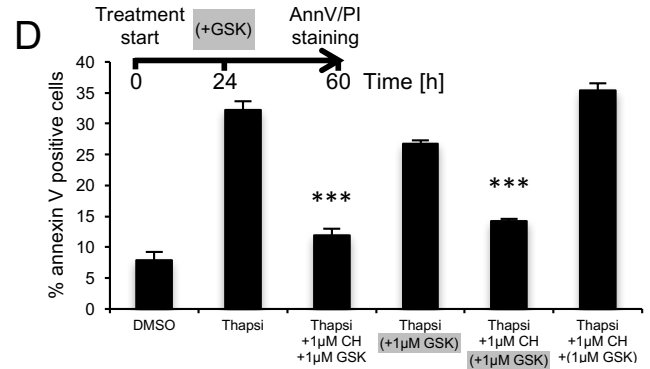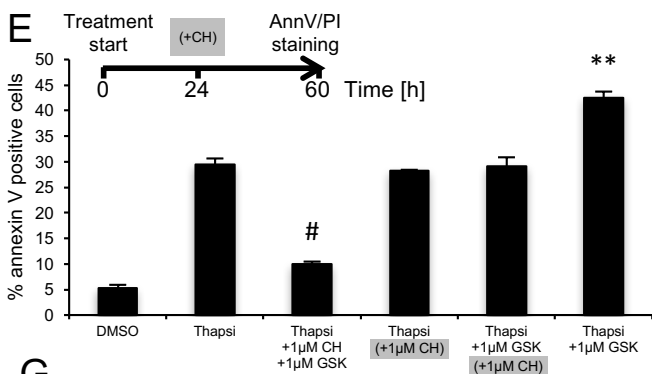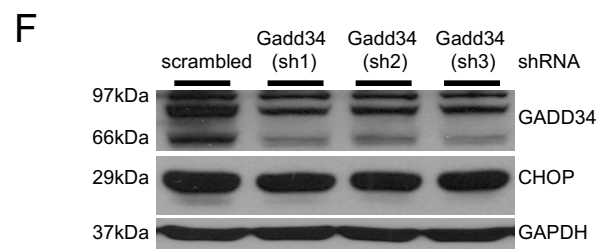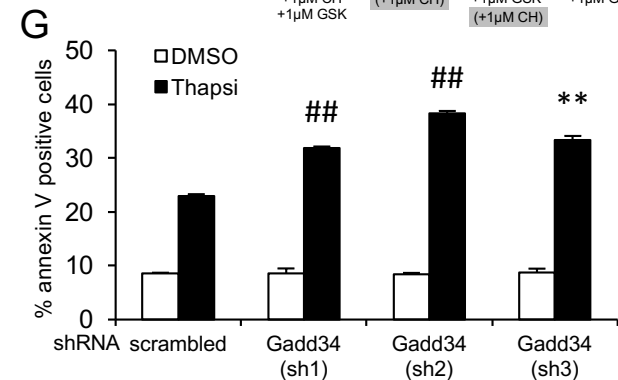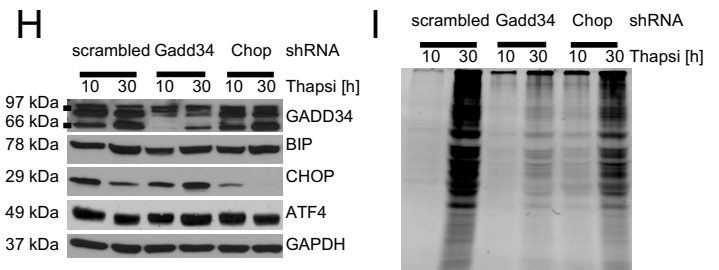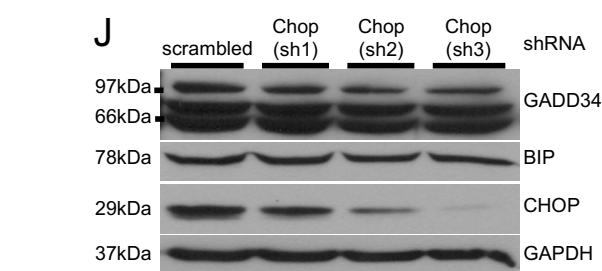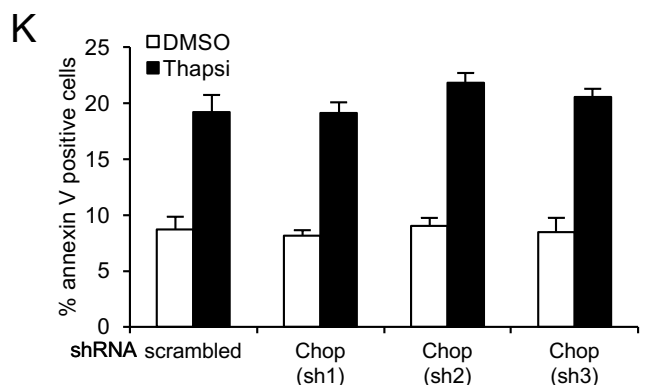

**Figure S1. Related to Figure 1. Dissecting the proapoptotic effects of thapsigargin in podocytes.** A) Signaling model of the PERK branch of the UPR. During ER stress, the activation of PERK leads to the phosphorylation of eIF2 $\alpha$ , which, by blocking general translation, induces ATF4. ATF4 upregulates CHOP and GADD34, and the latter is part of the negative feedback loop to restore translation. However, when ER stress persists, cells undergo apoptosis, linked to increased CHOP and GADD34. B) Western blot analysis of the UPR markers ATF4, CHOP, GADD34, and BIP after incubation of podocytes with 2.5 $\mu$ M thapsigargin in the presence or absence of CH and/or GSK for 15 hours. GAPDH served as a control. C-E) Podocyte cell death was determined at 60 hours of treatment with 2.5 $\mu$ M thapsigargin in the presence or absence of CH and/or GSK. The experiment was repeated with either GSK (C) or CH (D) applied 24 hours after initial drug treatment. Bar graphs represent mean percentages  $\pm$  SD of annexin V positive cells (n=3). \* p < 0.05; \*\* p < 0.01; # p < 0.001 (vs. thapsigargin, Bonferroni-corrected). F, J) Western blot analysis shows knockdown efficiency of several shRNAs against CHOP and GADD34. GAPDH served as a loading control. H, I) Western blot (GADD34, CHOP, ATF4) and de novo protein biosynthesis (see methods for details) analysis show the effect of GADD34- and CHOP-silencing on PERK activity. G, K) CHOP- and GADD34-depleted podocytes were treated in the presence or absence of 2.5 $\mu$ M thapsigargin. Cell death was assessed at 60h. Bar graphs represent mean percentages  $\pm$  SD of annexin V positive cells (n=3). \*\* p < 0.01, ## p < 0.0001 (vs. scrambled thapsigargin, Bonferroni-corrected).

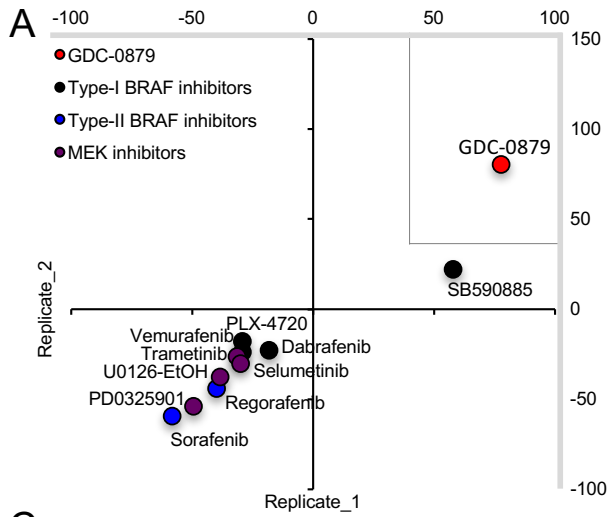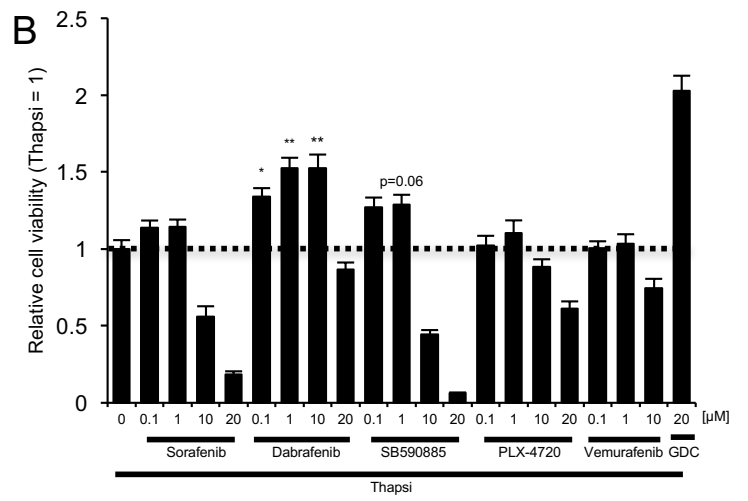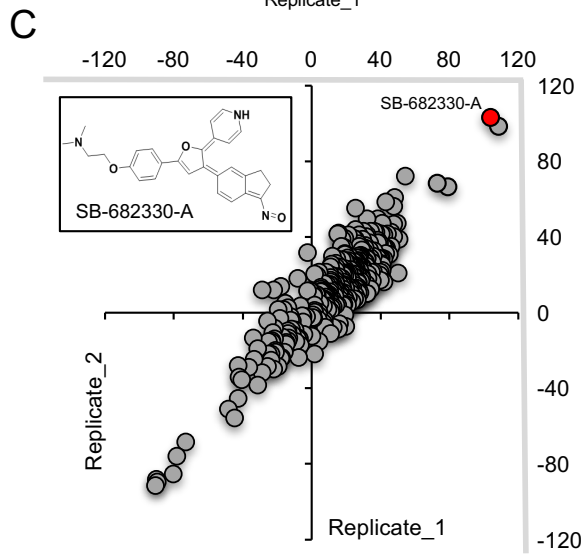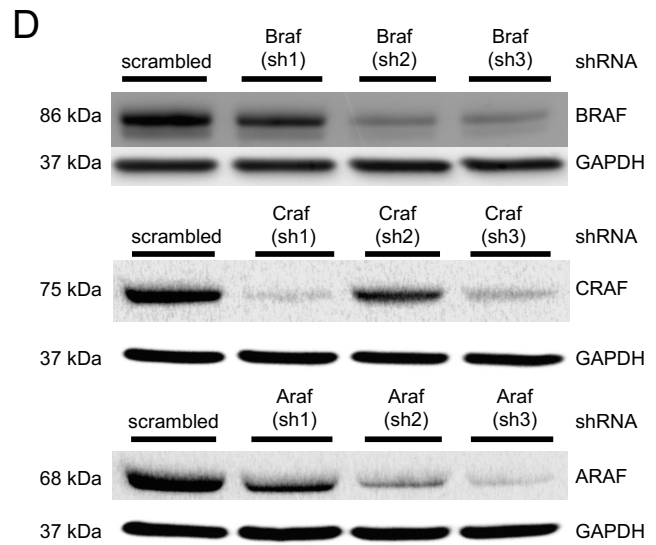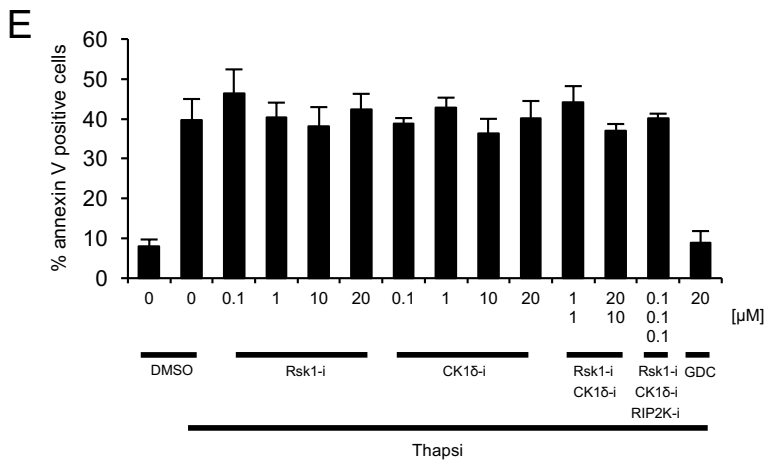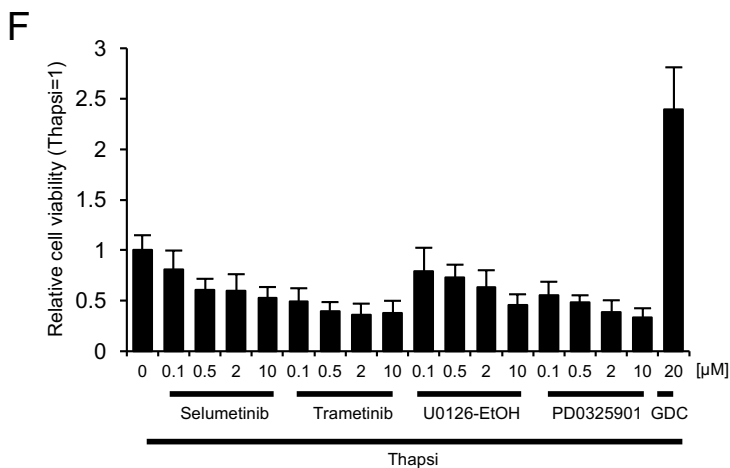

**Figure S2. Related to Figure 1 and 2. The effect of BRAF and MEK inhibitors on podocyte survival.** A) Data from the primary screen show GDC-0879 in relation to class I and class II BRAF and MEK inhibitors. SB590885 had a modest protective effect. B) A secondary screen of podocyte survival performed at 4 dose points (0.1 – 20 $\mu$ M) revealed statistically significant efficacy by Dabrafenib and a trend toward significance by SB590885. Bar graph represents relative cell viability (ATP levels)  $\pm$  SD. Thapsigargin treatment was set to 1 (n=16); \* p<0.05, \*\* p<0.01 (vs thapsi, Bonferroni-corrected). C) A screen of the GSK library consisting of 367 published kinase inhibitors (PKIS, 0.1 $\mu$ M and 1 $\mu$ M) identified the BRAF inhibitor SB-682330. Scatterplot between two replicates as % change of cell viability relative to thapsigargin–treated cells. D) Western blot analysis to verify BRAF, CRAF and ARAF knockdown. GAPDH served as a loading control. E) Podocytes were treated with thapsigargin in the presence or absence of inhibitors of CK1 $\delta$  (IC 261), RSK (SL0101), and RIPK2 (Necrostatin-2), respectively, for 60 hours. Bar graphs represent mean percentages  $\pm$  SD of annexin V positive cells (n=3). F) A secondary screen of podocyte survival performed at 4 dose points (0.1 – 20 $\mu$ M) of the indicated MEK inhibitors. Bar graph represents relative cell viability (ATP levels)  $\pm$  SD. Thapsigargin treatment was set to 1 (n=16).

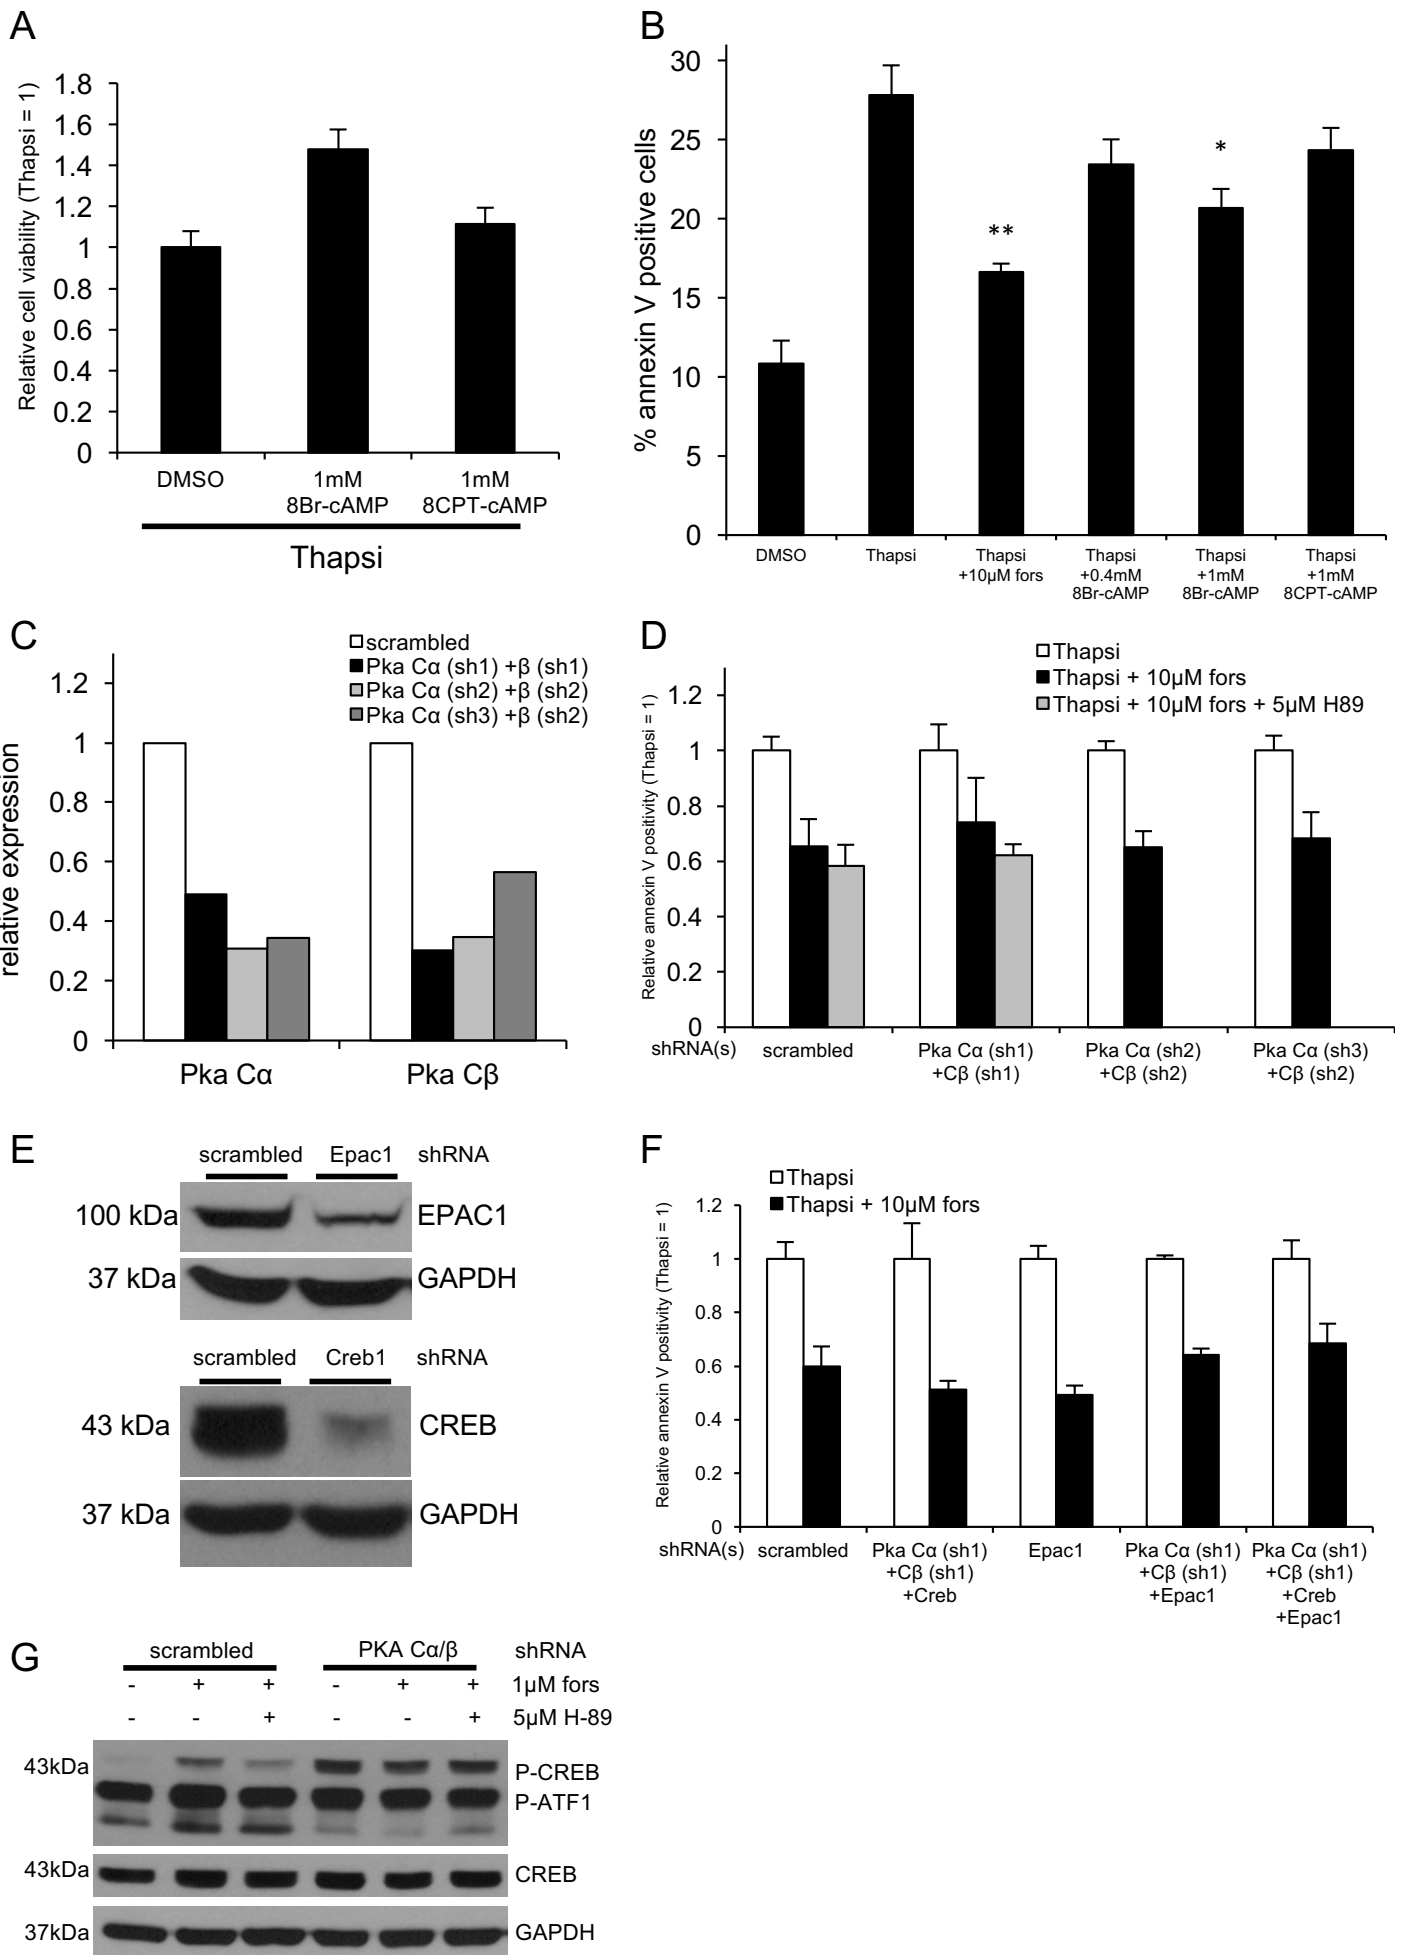

**Figure S3. Related to Figure 1 and 3. The cAMP-mediated effect of forskolin is independent of PKA–CREB and EPAC signaling.** A) The effect of 8Br-cAMP (1mM) and 8CPT-cAMP (1mM) on thapsigargin-treated podocytes at 96 hours. Bar graph represents relative cell viability (ATP levels)  $\pm$  SD. Thapsigargin treatment was set to 1 (n=32). B) Annexin V in podocytes treated with thapsigargin in the presence or absence of 8Br-cAMP and 8CPT-cAMP at 48 hours. Bar graph shows mean percentages  $\pm$  SD of annexin V positive cells (n=3). \*  $p < 0.05$ , \*\*  $p < 0.01$ , ###  $p < 0.0001$  (vs. thapsigargin, Bonferroni-corrected). C) PKA C $\alpha$  and C $\beta$  knockdown efficiency was determined by quantitative real-time PCR. Bar graph shows relative expression  $\pm$  SD of PKA C $\alpha$  and Pka C $\beta$ . Data normalized to podocytes expressing a scrambled shRNA control. D) Podocytes silenced for PKA C $\alpha$  and C $\beta$  using multiple shRNAs were treated with thapsigargin in the presence or absence of forskolin (black) and H89 (grey). Bar graph represents relative apoptosis and necrosis (annexin V positive cells)  $\pm$  SD. Thapsigargin alone treated cells served as a baseline control (n=3). E) Western blot analysis to verify EPAC and CREB knockdown. GAPDH served as a loading control. F) Podocytes depleted for PKA C $\alpha$ /C $\beta$  and/or EPAC and/or CREB were incubated with thapsigargin  $\pm$  forskolin and cell death was assessed at 48 hours. Bar graph shows relative annexin V positive cells  $\pm$  SD. Data normalized to thapsigargin (n $\geq$ 3). G) PKA C $\alpha$ /C $\beta$ -silencing shows a compensatory increase in p-CREB abundance, which is insensitive to forskolin and H89.

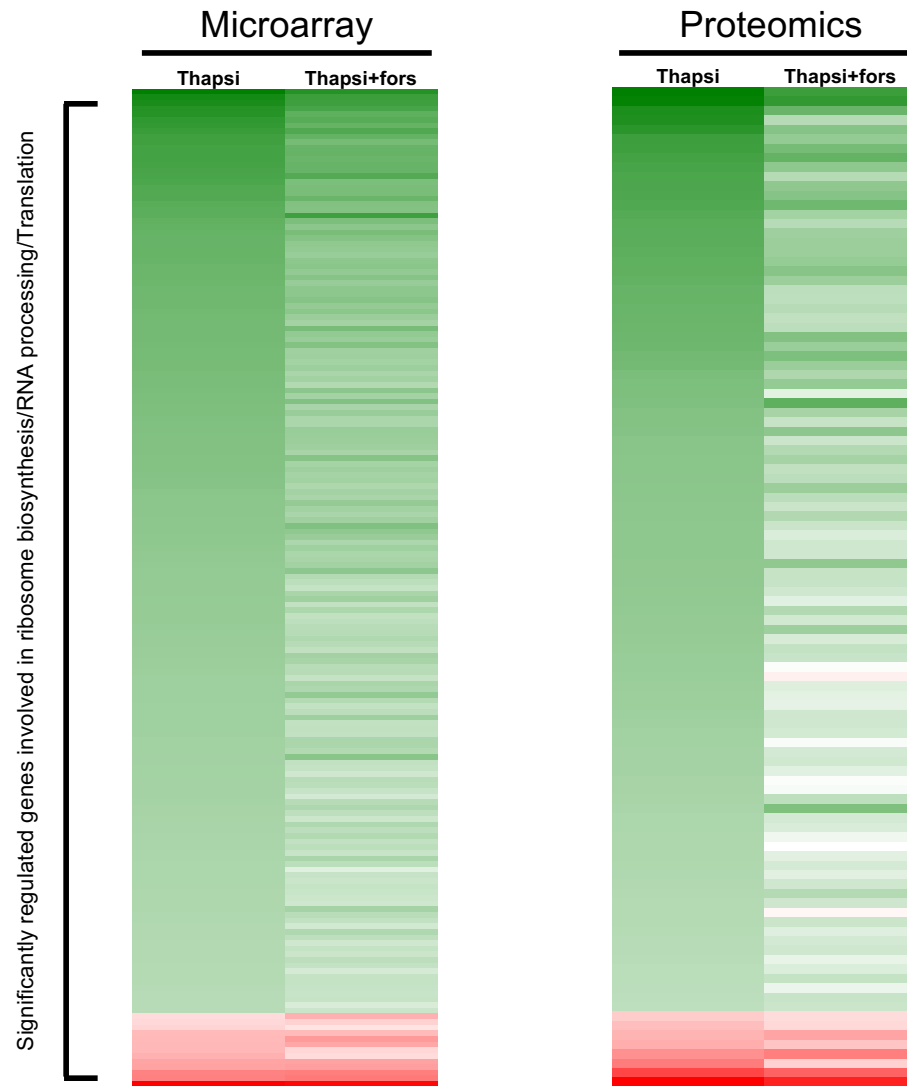

**Figure S4. Related to Figure 3. Forskolin attenuates the thapsigargin-mediated upregulation of signaling programs related to protein biosynthesis.** Heat maps show significantly regulated genes (microarray) or proteins (MS proteomics) linked with protein biosynthesis that contributed to the enriched GO gene sets in Figure 3A.



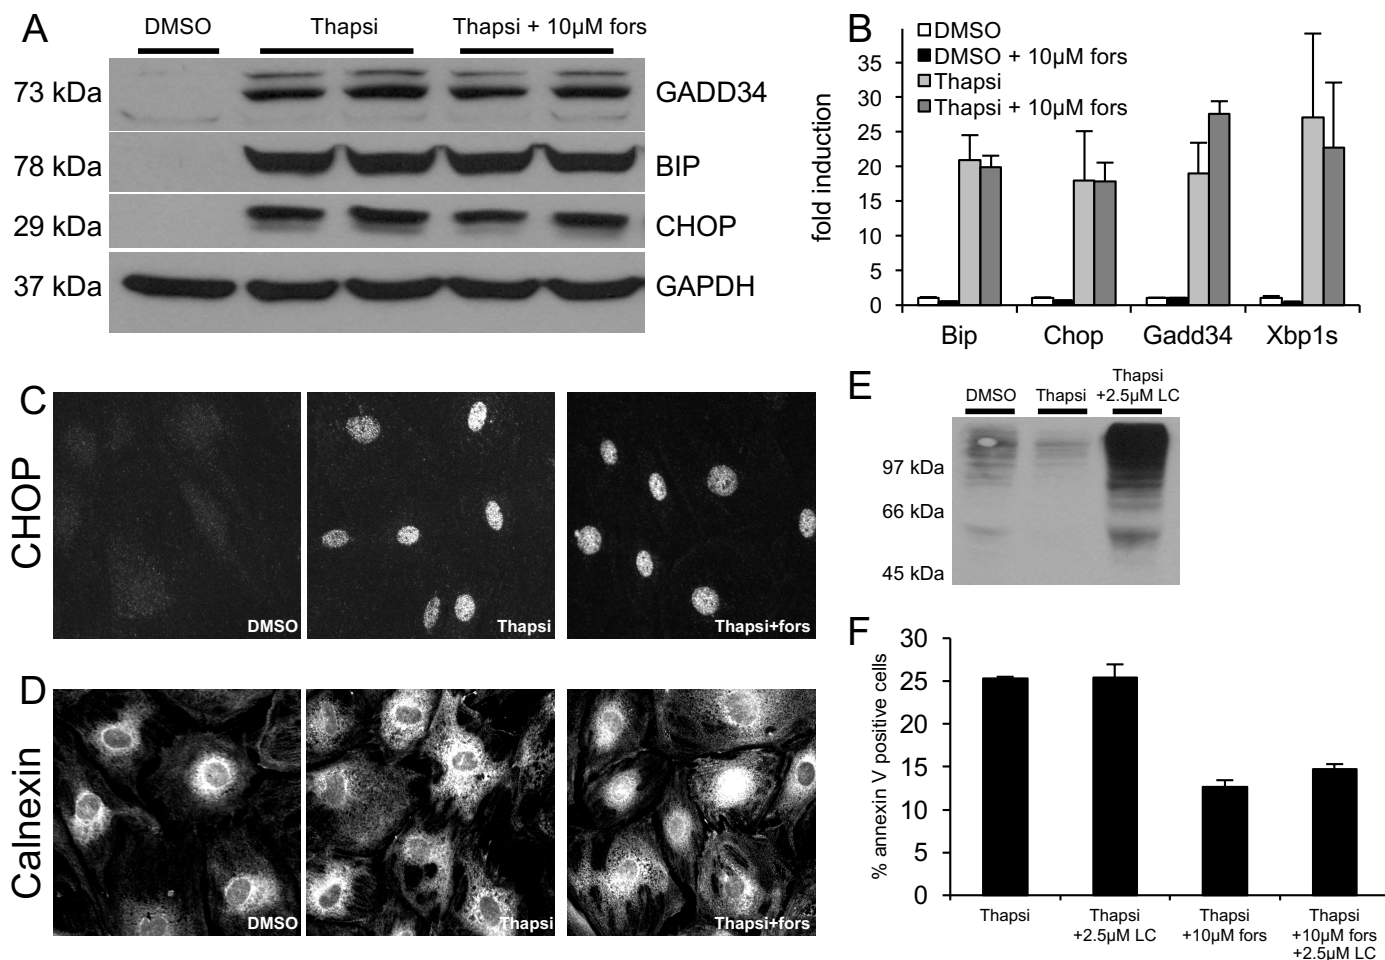

**Figure S5. Related to Figure 4. Forskolin attenuates podocyte death in a UPR-independent manner.** A) Western blot analysis of GADD34, BIP, and CHOP in whole cell lysates of podocytes treated with thapsigargin in the presence or absence of forskolin for 15 hours. GAPDH served as a loading control. B) Relative mRNA levels of Gadd34, Bip, Chop, as well as the spliced variant of Xbp1 (Xbp1s) in podocytes treated with thapsigargin  $\pm$  forskolin for 8 hours were evaluated by quantitative real-time PCR. Bar graph represents relative mRNA expression  $\pm$  SD. Vehicle (DMSO) treatment served as a baseline control (n=3). C, D) Immunocytochemistry of CHOP (C) and Calnexin (D) in podocytes treated with thapsigargin  $\pm$  forskolin for 15 hours. Representative images are shown. E) Western blot analysis of ubiquitination in whole cell lysates of podocytes treated with thapsigargin  $\pm$  lactacystin (LC) for 15 hours. F) Podocytes were incubated with thapsigargin  $\pm$  forskolin and/or LC and cell death was measured at 60 hours. Bar graph shows mean percentages  $\pm$  SD of annexin V positive cells (n=3).

| REAGENT or RESOURCE                                                                                   | SOURCE                                  | IDENTIFIER       |
|-------------------------------------------------------------------------------------------------------|-----------------------------------------|------------------|
| Oligonucleotides                                                                                      |                                         |                  |
| Primers (5'-3'); F: Forward; R: Reverse                                                               |                                         |                  |
| Gapdh<br>F-CTGCACCACCAACTGCTTAGC<br>R-GGCATGGACTGTGGTCATGAG                                           | (Sieber <i>et al.</i> , 2013)           | N/A              |
| Pkaca<br>F-GAATACAGCCCAGTTGGATCA<br>R-CTCGCCACCAGCTACATACTC                                           | (Watson <i>et al.</i> , 2006)           | N/A              |
| Pkacb<br>F-GGGGAACACTGCGATCGCCAA<br>R-CCAGGGACGTATTCATAACC                                            | (Watson <i>et al.</i> , 2006)           | N/A              |
| Bip<br>F-CACCAGGATGCGGACATTGA<br>R-AGGGCCTCCACTTCCATAGA                                               | (Cunha <i>et al.</i> , 2009)            | N/A              |
| Chop<br>F-CAACAGAGGTCACACGCACA<br>R-GGCACTGACCACTCTGT TTC                                             | (Cunha <i>et al.</i> , 2009)            | N/A              |
| Gadd34<br>F-AGAGAAGACCAAGGGACGTG<br>R-AACAATCTGAGCCGCTCTG                                             | (Cunha <i>et al.</i> , 2009)            | N/A              |
| Xbp1s<br>F-TGCTGAGTCCGCAGCAGGTG<br>R-ACTAGCAGACTCTGGGAAGG                                             | (Van Schadewijk <i>et al.</i> , 2012)   | N/A              |
|                                                                                                       |                                         |                  |
| shRNAs (5'-3'; PLKO.1 vector)                                                                         | Mission shRNA bacterial glycerol stocks |                  |
| Pkaca<br>sh1: CCCGAGATTATCCTGAGCAAA<br>sh2: CCACTTCAGCTCTGACTTGAA<br>sh3: CACGAGTAACTTTGACGACTA       | Sigma-Aldrich                           | SHCLNG-NM_008854 |
| Pkacb<br>sh1: CCTCAGCAAGGGTTACAATAA<br>sh2: GTGGATCTGACAAAGCGATTC                                     | Sigma-Aldrich                           | SHCLNG-NM_011100 |
| Epac1<br>GCTACTCAGGAAGTTCATCAA                                                                        | Sigma-Aldrich                           |                  |
| Creb1<br>GCCTGAAAGCAACTACAGAAT                                                                        | Sigma-Aldrich                           | SHCLNG-NM_133828 |
| Chop<br>sh1: GCGGGCTCTGATCGACCGCAT<br>sh2: GAAACGAAGAGGAAGAATCAA<br>sh3: GATTCCAGTCAGAGTTCATG         | Sigma-Aldrich                           | SHCLNG-NM_007837 |
| Gadd34<br>sh1: CTGAGAAAGTCACAGTCCATT<br>sh2: TTCCAGGTGGCCTTCTATTTA<br>sh3: GCGGGCTCTGATCGACCGCAT      | Sigma-Aldrich                           | SHCLNG-NM_008654 |
| Araf<br>sh1: CAGGCTCATCAAAGGAAGAAA<br>sh2: GCATGAGTGTCTATGACTCTT<br>sh3: CCTAAAGTCCAACAATATCTT        | Sigma-Aldrich                           | SHCLNG-NM_009703 |
| Braf<br>sh1: GCAGATGAAGATCATCGCAAT<br>sh2: CCACATCATTGAGACCAAATT<br>sh3: CGAGGATACCTATCTCCAGAT        | Sigma-Aldrich                           | SHCLNG-XM_355754 |
| Raf1 (Craf)<br>sh1: GCTTTGGTACTACAGAACTTT<br>sh2: TCCAGATGTTCCAGCTAATTG<br>sh3: CAAGCAATACTATCCGGGTTT | Sigma-Aldrich                           | SHCLNG-NM_029780 |
| Scrambled<br>CAACAAGATGAAGAGCACCAA                                                                    | Sigma-Aldrich                           | SHC002           |

**Table S1. Related to Key Resources Table. Primer and shRNA sequences.**
